# Supplementary material for: Compound-specific radiocarbon dating and mitochondrial DNA analysis of the Pleistocene hominin from Salkhit Mongolia
Source: PubMed Central journal article supplement (PMC6353915; doi:10.1038/s41467-018-08018-8), 2019-01-30
Supplement: 41467_2018_8018_MOESM1_ESM.pdf [file 41467_2018_8018_MOESM1_ESM.pdf]

## **Supplementary Information**

### **Compound-specific radiocarbon dating and mitochondrial DNA analysis of the Pleistocene hominin from Salkhit Mongolia**

Devièse et al.

This PDF includes:

- Supplementary Figures 1 to 4
- Supplementary Tables 1 to 3
- Supplementary References

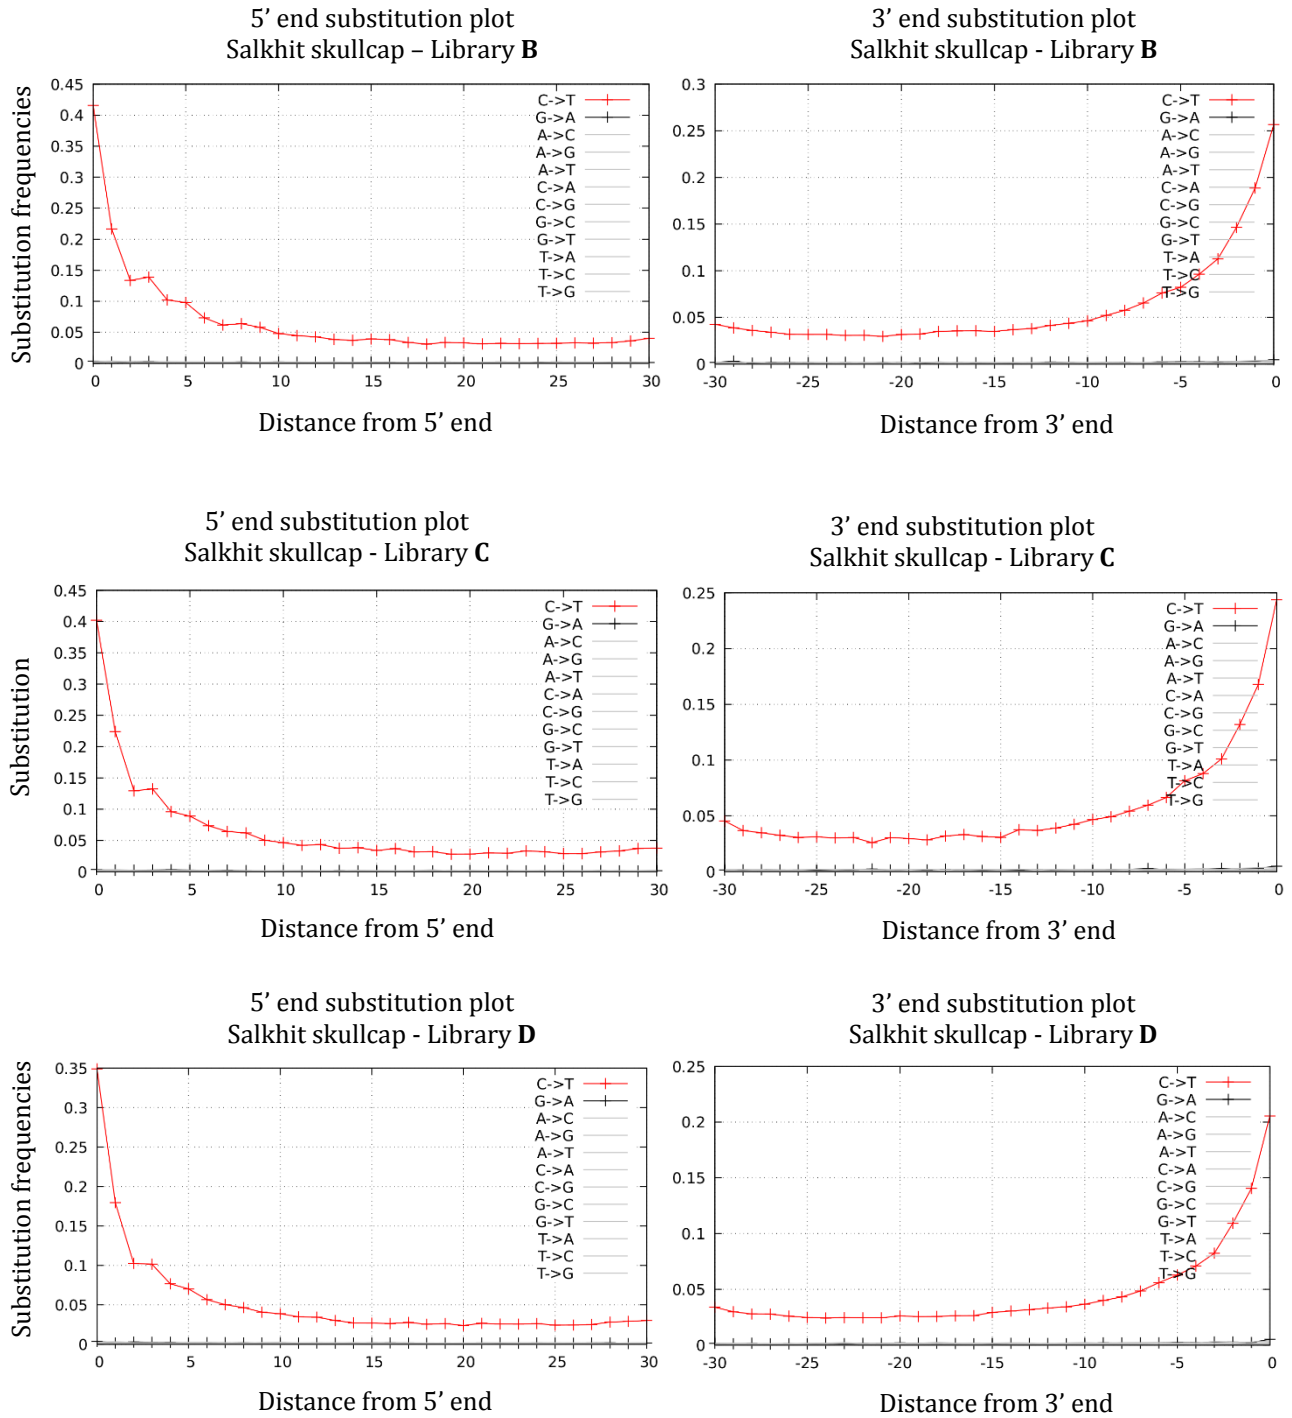

**Supplementary Figure 1.** Pattern of cytosine (c) to thymine (T) substitution in the three DNA libraries from Salkhit DNA extracts B, C and D. Plots of the frequencies of C in the reference mtDNA that occur as T among all fragments sequenced (red) are shown for the 30 terminal positions.

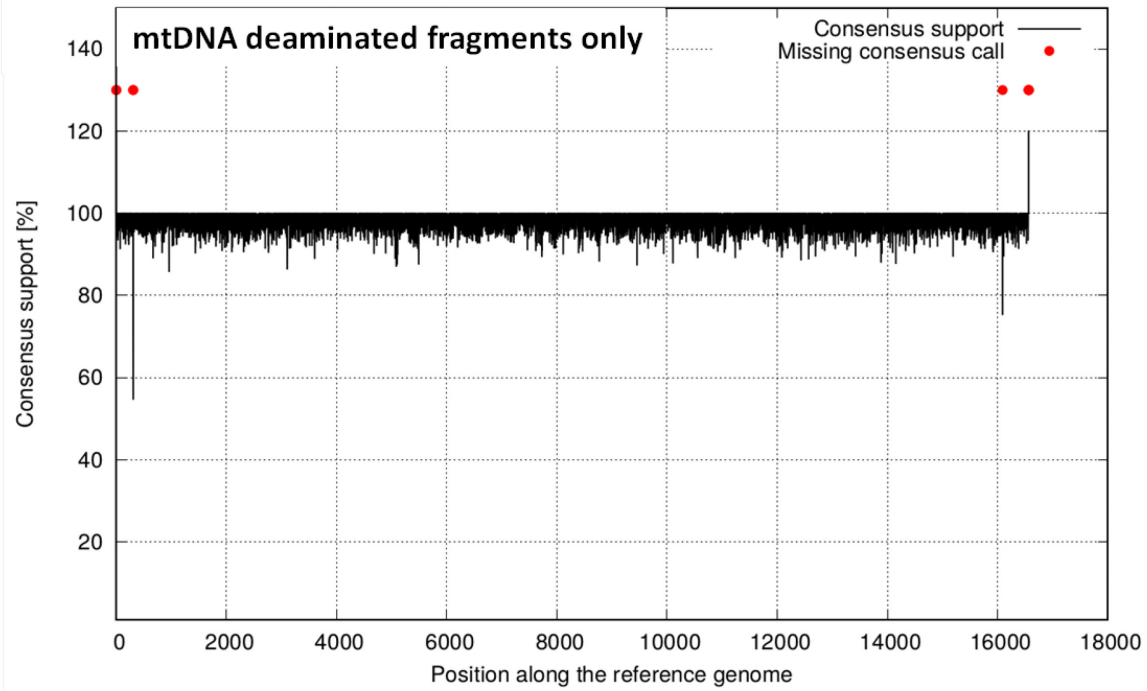

**Supplementary Figure 2.** Consensus support for each position of the mtDNA sequence of the Salkhit individual using DNA fragments showing evidence of cytosine deamination at least one of their three first or three last positions mapped to the rCRS reference mtDNA (top). In the former consensus mtDNA sequence 2 positions have less than 80% support (red dots).

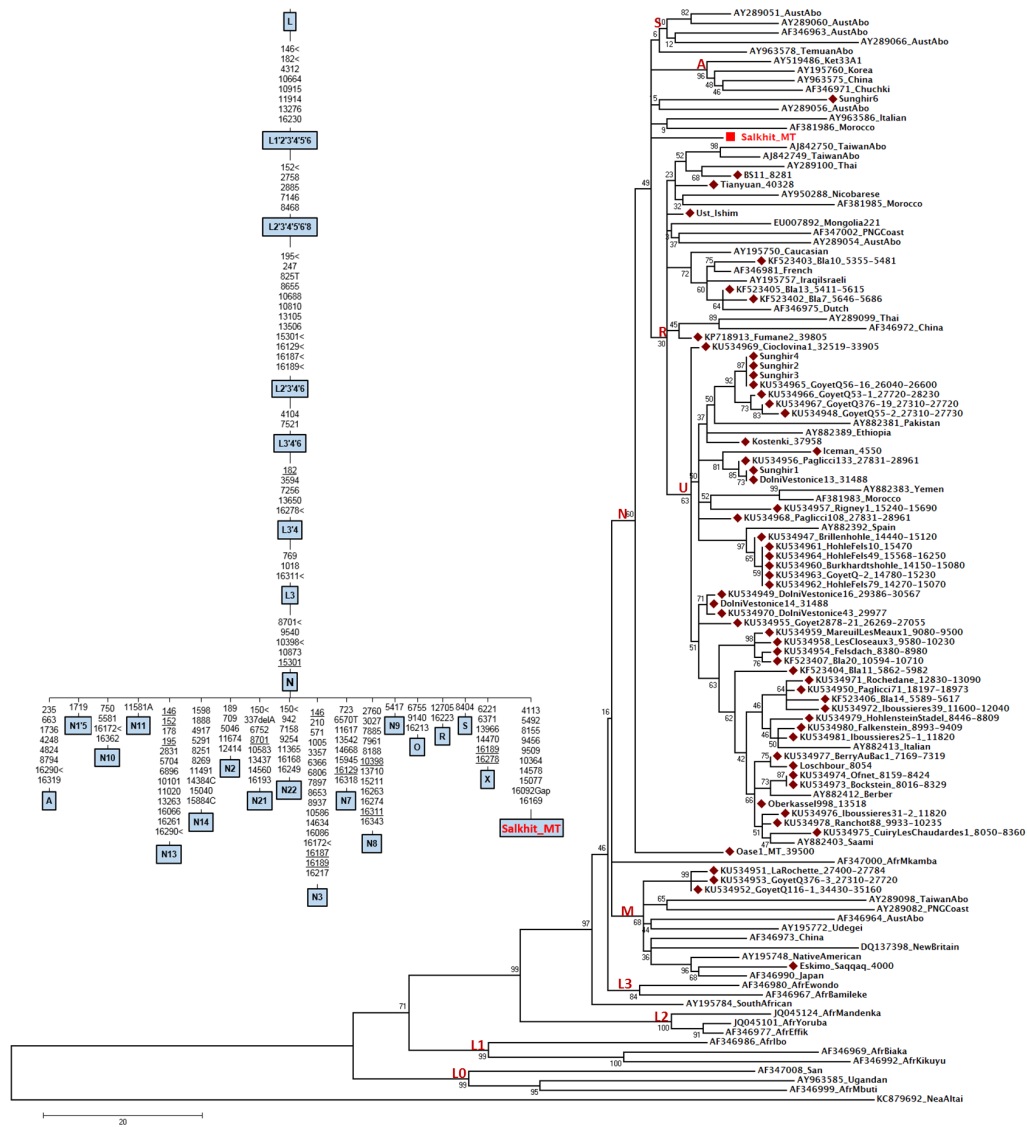

**Supplementary Figure 3.** Maximum Parsimony of ancient and present-day modern human mtDNA including the Salkhit sequence. The evolutionary history of the Salkhit mtDNA sequence was inferred using the Maximum Parsimony method. The subtree on the left was obtained using mtPhyl (<https://sites.google.com/site/mtphyl/home>) and shows the Salkhit mtDNA embranchment among the main sub-clades of the N haplogroup while categorizing the substitutions accumulated in the Salkhit mtDNA since it's divergence from the N-haplogroup clades common ancestor. The tree on the right was obtained in MEGA6 <sup>1</sup> and is #1 out of 3 most parsimonious trees (length = 1327) putting in a phylogenetic network 58 ancient (marked by a cardinal red diamond) and 55 present-day modern human mtDNA including the Salkhit sequence (marked by a red square). The mtDNA sequence of a Neanderthal from Altai is used as outgroup. The percentage of replicate trees in which the associated taxa clustered together in the bootstrap test (1000 replicates) are shown next to the branches. The tree was obtained using the Subtree-Pruning-Regrafting (SPR) algorithm and drawn to scale, with branch lengths in the units of the number of changes over the whole sequence calculated using the average pathway method. The nodes leading to the main mtDNA haplogroups are noted by the name of the corresponding haplogroup in red.

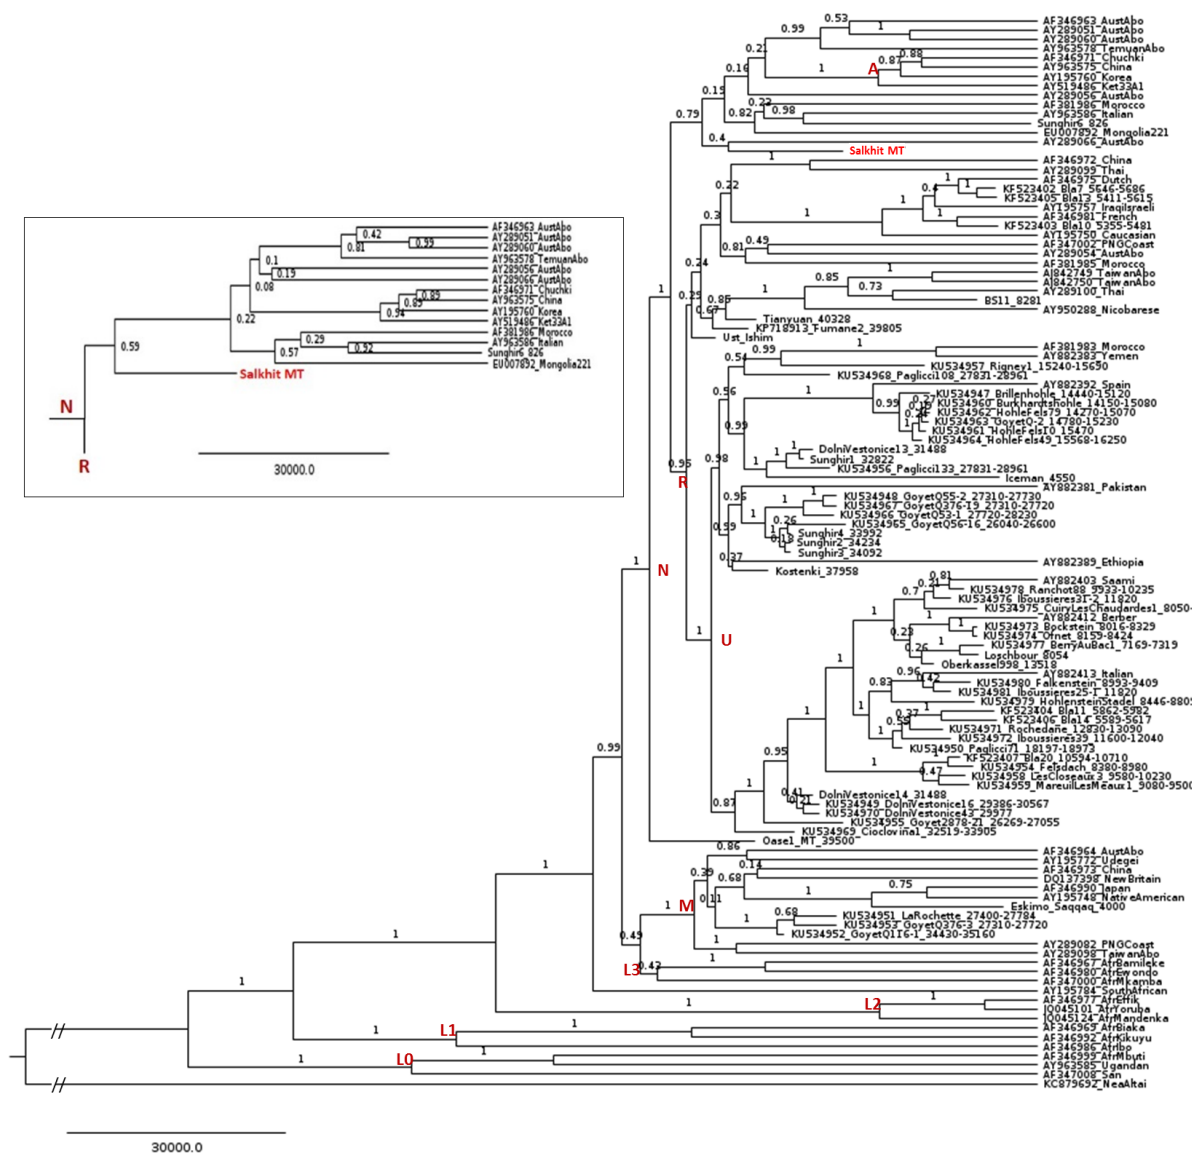

**Supplementary Figure 4.** Bayesian phylogenetic tree of the Salkhit mtDNA and ancient and present-day human mtDNAs. Several population models were tested and they differ in the branching structure among sub-clades inside the N haplogroup, including two distinct branching for the Salkhit mtDNA, both shown here. The full tree represent the best supported tree obtained using a strict molecular clock and Bayesian Skyline population size model, and the subtree a well less supported tree with a slightly different branch structure within the N haplogroup. The statistical supports of the nodes (Bayesian posterior probability) are indicated along the branch and the designations of the main haplogroups are given in red. The scale bar denotes the time in year.

**Supplementary Table 1.** Chronometric data of Mongolian Upper Paleolithic sites. The location of the sites is reported on Fig. 1.

| Site / Phase                                                                                                                                                                                                                                                                                                                      | Location | Age ( ka BP)                                                                                                                                                                                                                                                                                                                                                         | Reference                                                                   |
|-----------------------------------------------------------------------------------------------------------------------------------------------------------------------------------------------------------------------------------------------------------------------------------------------------------------------------------|----------|----------------------------------------------------------------------------------------------------------------------------------------------------------------------------------------------------------------------------------------------------------------------------------------------------------------------------------------------------------------------|-----------------------------------------------------------------------------|
| Tolbor 4 (Horizon 3)<br>Tolbor 4 (Horizon 4)<br>Tolbor 4 (Horizon 5)<br>Tolbor 4 (Horizon 5)<br>Tolbor 4 (Horizon 6)<br>Tolbor 4 (Horizon 6)                                                                                                                                                                                      | 1        | 14547 ± 73 BP (AA-93139)<br>26700 ± 300 BP (AA-84135)<br>31210 ± 410 BP (AA-93140)<br>>41050 BP (AA-79326)<br>35230 ± 680 BP (AA-93141)<br>37400 ± 2600 BP (AA-79314)                                                                                                                                                                                                | 2<br>2<br>2<br>2-4<br>2<br>2-4                                              |
| Tolbor 15 (Horizon 3)<br>Tolbor 15 (Horizon 3)<br>Tolbor 15 (Horizon 4)<br>Tolbor 15 (Horizon 4)<br>Tolbor 15 (Horizon 5)<br>Tolbor 15 (Horizon 5)<br>Tolbor 15 (Horizon 7)<br>Tolbor 15 (Horizon 7) | 1        | 14055 ± 80 BP (AA-84136)<br>14930 ± 70 BP (Beta-263742)<br>14680 ± 70 BP (Beta-263744)<br>14820 ± 70 BP (Beta-263745)<br>28460 ± 310 BP (AA-84137)<br>32200 ± 1400 BP (AA-93137)<br>26700 ± 300 BP (AA-84135)<br>29150 ± 20 BP (AA-84138)<br>33200 ± 1500 BP (AA-93137)<br>34010 ± 200 BP (MAMS-14934)<br>33470 ± 190 BP (MAMS-14935)<br>34340 ± 210 BP (MAMS-14937) | 2-5<br>2-4<br>2-4<br>2-4<br>2-4<br>2<br>3,4<br>2-4<br>2<br>2<br>2<br>2<br>2 |
| Tolbor 16 (Unit 4)<br>Tolbor 16 (Unit 7)<br>Tolbor 16 (Test pit (Pit 1) Unit 7)                                                                                                                                                                                                                                                   | 1        | 15660 ± 40 BP (MAMS-14938)<br>33320 ± 180 BP (MAMS-14932)<br>>45400 BP (AA-93134)                                                                                                                                                                                                                                                                                    | 2<br>2<br>2                                                                 |
| Tolbor 17 (Test pit 2, Level 3)                                                                                                                                                                                                                                                                                                   | 1        | 29230 ± 930 BP (AA-93135)                                                                                                                                                                                                                                                                                                                                            | 2                                                                           |
| Tolbor 21 (Test pit 1, Level 3)<br>Tolbor 21 (Test pit 1, Level 4)                                                                                                                                                                                                                                                                | 1        | 39240 ± 360 BP (MAMS-14936)<br>44640 ± 690 BP (MAMS-14933)                                                                                                                                                                                                                                                                                                           | 2<br>2                                                                      |
| Dörölj 1                                                                                                                                                                                                                                                                                                                          | 2        | 29910 ± 310 BP (GifA-99560)<br>29540 ± 390 BP (GifA-99561)<br>31880 ± 800 BP (GifA-11664)<br>21820 ± 190 BP (GifA-102451)<br>22030 ± 180 BP (GifA-102453)                                                                                                                                                                                                            | 2,6<br>2,3<br>2,3,6<br>2,3<br>2,3                                           |
| Orkhon 1 (Unit 1)                                                                                                                                                                                                                                                                                                                 | 3        | 34400 ± 600 BP                                                                                                                                                                                                                                                                                                                                                       | 6                                                                           |
| Orkhon 7 (Excavation Unit 1, Horizon 2)<br>Orkhon 7 (Excavation Unit 3, Horizon 2)<br>Orkhon 7 (Excavation Unit 3, Horizon 2)<br>Orkhon 7 (Layer 5)<br>Orkhon 7 (Layer 7)<br>Orkhon                                                                                                                                               | 3        | 23595 ± 155 BP (SOAN-2883)<br>24400 ± 1100 BP *<br>25500 ± 1400 BP *<br>25,5 ky BP<br>35265 ± 500 BP<br>33785 ± 300 BP (SOAN-2885)                                                                                                                                                                                                                                   | 4<br>4<br>4<br>6<br>6<br>4                                                  |
| Chikhen Agui                                                                                                                                                                                                                                                                                                                      | 4        | 27432 ± 872 BP (AA-26580)                                                                                                                                                                                                                                                                                                                                            | 3,4,7                                                                       |
| Chikhen 2 (Horizon 2.5)                                                                                                                                                                                                                                                                                                           | 4        | 30550 ± 410 BP (AA-31870)                                                                                                                                                                                                                                                                                                                                            | 3,4,7                                                                       |
| Tsagaan Agui (Stratum 3)                                                                                                                                                                                                                                                                                                          | 5        | 30942 ± 478 BP (AA-26589)<br>33840 ± 640 BP (AA-23158)                                                                                                                                                                                                                                                                                                               | 7<br>7                                                                      |
| Rashaan Khad                                                                                                                                                                                                                                                                                                                      | 6        | 39,100 ± 1,000 BP (OxA-34324)                                                                                                                                                                                                                                                                                                                                        | 8                                                                           |
| Salkhit                                                                                                                                                                                                                                                                                                                           | 7        | 30400 ± 300 BP (X-2717-25)                                                                                                                                                                                                                                                                                                                                           | this paper                                                                  |

\* dates generated by non-equilibrium uranium methods (Pa-231 and Th-230)

**Supplementary Table 2.** Characteristics of the mtDNA enriched libraries generated from the Salkhit skullcap. Seq = sequences, Cond = conditional deamination frequency of putative ancient DNA molecules in the libraries, deam = deaminated. The contamination proportion is estimated based on positions 10,364 and 14,578 (in the rCRS reference genome) specific of the Salkhit individual.

| Library          | # Total seq. generated | #Fragment >= 35 bp | #Unique mapped fragments (>= 35 bp) | Average duplication rate | Average fragment size (bp) | 5' C to T frequency (%) | Cond. 5' C to T frequency (%) | 3' C to T frequency (%) | Cond. 3' C to T frequency (%) | #deam. fragments | Average fragment size (bp) |
|------------------|------------------------|--------------------|-------------------------------------|--------------------------|----------------------------|-------------------------|-------------------------------|-------------------------|-------------------------------|------------------|----------------------------|
| Salkhit - B      | 1,478,545              | 1,100,636          | 67,434                              | 10.4                     | 56.6                       | 41.6                    | 44.9                          | 25.7                    | 27.3                          | 10,795           | 53.7                       |
| Salkhit - C      | 1,609,955              | 1,193,323          | 67,340                              | 11.4                     | 57.1                       | 40.2                    | 45.2                          | 24.4                    | 27.4                          | 16,839           | 52.4                       |
| Salkhit - D      | 1,560,580              | 1,183,491          | 130,110                             | 5.8                      | 59.4                       | 34.9                    | 41.7                          | 20.6                    | 26.0                          | 10,390           | 54.2                       |
| Negative control | 183,528                | 56,303             | 64                                  | 810.2                    | 56.9                       | 14.3                    | 0                             | 7.1                     | 0                             | 4                | 56.5                       |

**Supplementary Table 3.** Ancient specimens used for the mtDNA phylogeny. For each sample the GenBank accession number, the country of origin, and the uncalibrated and calibrated (using the IntCal13 calibration curve of Reimer et al.<sup>13</sup>) radiocarbon date are reported. The specimens marked by \* have not been directly dated.

| Sample              | GenBank<br>Accession Number | origin (Country) | Uncalibrated (BP) |     | Calibrated (IntCal13) (BP) |       |       |
|---------------------|-----------------------------|------------------|-------------------|-----|----------------------------|-------|-------|
|                     |                             |                  | ages              | ±   | upper                      | lower | mean  |
| BerryAubac1         | KU534977                    | France           | 6325              | 35  | 7320                       | 7168  | 7244  |
| BLA10               | KF523403                    | Germany          | 4590              | 25  | 5445                       | 5085  | 5265  |
| BLA11               | KF523404                    | Germany          | 5145              | 30  | 5987                       | 5759  | 5873  |
| BLA13               | KF523405                    | Germany          | 4730              | 25  | 5583                       | 5327  | 5455  |
| BLA14               | KF523406                    | Germany          | 4835              | 30  | 5644                       | 5478  | 5561  |
| BLA20               | KF523407                    | Germany          | 9370              | 45  | 10713                      | 10441 | 10577 |
| BLA7                | KF523402                    | Germany          | 4860              | 30  | 5653                       | 5488  | 5571  |
| Bockstein*          | KU534973                    | Germany          | 7350              | 70  | 8331                       | 8016  | 8174  |
| Brillenhohle        | KU534947                    | Germany          | 12470             | 65  | 15034                      | 14245 | 14640 |
| BS11                | KC521454                    | China            | 7368              | 34  | 8316                       | 8048  | 8182  |
| Burkhardtshohle     | KU534960                    | Germany          | 12450             | 110 | 15080                      | 14153 | 14617 |
| Cioclovina1         | KU534969                    | Romania          | 28510             | 170 | 33085                      | 31788 | 32437 |
| CuiryLesChaudardes1 | KU534975                    | France           | 7400              | 60  | 8363                       | 8048  | 8206  |
| DolniVestonice13    | KC521459                    | Czech Republic   | 26640             | 110 | 31070                      | 30666 | 30868 |
| DolniVestonice14    | KC521458                    | Czech Republic   | 26640             | 110 | 31070                      | 30666 | 30868 |
| DolniVestonice16*   | KU534949                    | Czech Republic   | 25740             | 210 | 30575                      | 29395 | 29985 |
| DolniVestonice43*   | KU534970                    | Czech Republic   | 25740             | 210 | 30575                      | 29395 | 29985 |
| Eskimo_Saqqaq       | EU725621                    | Greenland        | 4044              | 31  | 4783                       | 4423  | 4603  |
| Falkenstein         | KU534980                    | Germany          | 8185              | 80  | 9407                       | 8994  | 9201  |
| Felsdach*           | KU534954                    | Germany          | 7770              | 120 | 8979                       | 8380  | 8680  |
| Fumane2             | KP718913                    | Italy            | 33140             | 460 | 38523                      | 36249 | 37386 |
| Goyet2878-21        | KU534955                    | Belgium          | 22360             | 110 | 27058                      | 26272 | 26665 |
| GoyetQ116-1-3       | KU534952                    | Belgium          | 30880             | 170 | 35166                      | 34436 | 34801 |
| GoyetQ-2            | KU534963                    | Belgium          | 12650             | 50  | 15232                      | 14778 | 15005 |
| GoyetQ376-19        | KU534967                    | Belgium          | 23260             | 110 | 27718                      | 27313 | 27516 |
| GoyetQ376-3         | KU534953                    | Belgium          | 29370             | 180 | 33941                      | 33153 | 33547 |
| GoyetQ53-1          | KU534966                    | Belgium          | 23920             | 100 | 28231                      | 27719 | 27975 |
| GoyetQ55-2          | KU534948                    | Belgium          | 23270             | 120 | 27731                      | 27311 | 27521 |
| GoyetQ56-16         | KU534965                    | Belgium          | 22100             | 100 | 26602                      | 26041 | 26322 |
| HohleFels10*        | KU534961                    | Germany          | 12770             | 220 | 15873                      | 14260 | 15067 |
| HohleFels49*        | KU534964                    | Germany          | 12770             | 220 | 15873                      | 14260 | 15067 |
| HohleFels79         | KU534962                    | Germany          | 12490             | 70  | 15071                      | 14267 | 14669 |
| HohlensteinStadel   | KU534979                    | Germany          | 7835              | 80  | 8978                       | 8448  | 8713  |
| Ibousseries25-1*    | KU534981                    | France           | 10140             | 50  | 12040                      | 11411 | 11726 |



|                         |                                 |            |       |      |       |       |       |
|-------------------------|---------------------------------|------------|-------|------|-------|-------|-------|
| <b>Ibousseries31-2*</b> | KU534976                        | France     | 10140 | 50   | 12040 | 11411 | 11726 |
| <b>Ibousseries39</b>    | KU534972                        | France     | 10140 | 50   | 12040 | 11411 | 11726 |
| <b>Iceman</b>           | Ermini & al. 2008 <sup>9</sup>  | Italy      | 4550  | 19   | 5315  | 5067  | 5191  |
| <b>Kostenki</b>         | FN600416                        | Russia     | 33250 | 500  | 38684 | 36262 | 37473 |
| <b>LaRochette</b>       | KU534951                        | France     | 23630 | 130  | 27962 | 27516 | 27739 |
| <b>LesCloseaux3</b>     | KU534958                        | France     | 8870  | 130  | 10231 | 9564  | 9898  |
| <b>Loschbour</b>        | KC521455                        | Luxembourg | 7205  | 50   | 8160  | 7948  | 8054  |
| <b>MareuilLesMeaux1</b> | KU534959                        | France     | 8320  | 90   | 9496  | 9034  | 9265  |
| <b>Oase</b>             | Fu & al. 2014 <sup>10</sup>     | Romania    | 34950 | 990  | 41761 | 37311 | 39536 |
| <b>Oberkassel998</b>    | KC521457                        | Germany    | 12180 | 100  | 14501 | 13758 | 14130 |
| <b>Ofnet*</b>           | KU534974                        | Germany    | 7480  | 80   | 8425  | 8065  | 8245  |
| <b>Paglicci108*</b>     | KU534968                        | Italy      | 23470 | 370  | 28430 | 27070 | 27750 |
| <b>Paglicci133*</b>     | KU534956                        | Italy      | 28100 | 400  | 33103 | 31210 | 32157 |
| <b>Paglicci71*</b>      | KU534950                        | Italy      | 15460 | 220  | 19245 | 18220 | 18733 |
| <b>Ranchot88</b>        | KU534978                        | France     | 8985  | 40   | 10236 | 9933  | 10085 |
| <b>Rigney1</b>          | KU534957                        | France     | 12930 | 55   | 15691 | 15240 | 15466 |
| <b>Rochedane</b>        | KU534971                        | France     | 11120 | 50   | 13089 | 12830 | 12960 |
| <b>Sunghir1</b>         | Sikora & al. 2017 <sup>11</sup> | Russia     | 28890 | 430  | 33875 | 31770 | 32823 |
| <b>Sunghir2</b>         | Sikora & al. 2017 <sup>11</sup> | Russia     | 30100 | 550  | 35283 | 33185 | 34234 |
| <b>Sunghir3</b>         | Sikora & al. 2017 <sup>11</sup> | Russia     | 30000 | 550  | 35154 | 33031 | 34093 |
| <b>Sunghir4</b>         | Sikora & al. 2017 <sup>11</sup> | Russia     | 29820 | 280  | 34485 | 33499 | 33992 |
| <b>Sunghir6</b>         | Sikora & al. 2017 <sup>11</sup> | Russia     | 884   | 23   | 905   | 732   | 819   |
| <b>Tianyuan</b>         | KC417443                        | China      | 34430 | 510  | 40254 | 37761 | 39008 |
| <b>Ust_Ishim</b>        | Fu & al. 2015 <sup>12</sup>     | Russia     | 41400 | 1400 | 48313 | 42793 | 45553 |

## Supplementary References

- 1 Tamura, K., Stecher, G., Peterson, D., Filipski, A. & Kumar, S. MEGA6: Molecular Evolutionary Genetics Analysis Version 6.0. *Molecular Biology and Evolution* **30**, 2725-2729, doi:<https://doi.org/10.1093/molbev/mst197> (2013).
- 2 Zwyns, N. *et al.* The open-air site of Tolbor 16 (Northern Mongolia): Preliminary results and perspectives. *Quaternary International* **347**, 53-65, doi:<https://doi.org/10.1016/j.quaint.2014.05.043> (2014).
- 3 Gladyshev, S. A., Olsen, J. W., Tabarev, A. V. & Jull, A. J. T. The Upper Paleolithic of Mongolia: Recent finds and new perspectives. *Quaternary International* **281**, 36-46, doi:<https://doi.org/10.1016/j.quaint.2012.01.032> (2012).
- 4 Gladyshev, S. A., Olsen, J. W., Tabarev, A. V. & Kuzmin, Y. V. Chronology and Periodization of Upper Paleolithic Sites in Mongolia. *Archaeology, Ethnology and Anthropology of Eurasia* **38**, 33-40, doi:<https://doi.org/10.1016/j.aeae.2010.10.003> (2010).
- 5 Zwyns, N., Gladyshev, S., Tabarev, A. & Gunchinsuren, B. in *Encyclopedia of Global Archaeology* (ed Claire Smith) 5025-5032 (Springer New York, 2014).
- 6 Jaubert, J. *et al.* in *Le Paléolithique supérieur / The Upper Paleolithic. Sessions générales et posters / General Sessions and Posters, Actes du XIVe Congrès UISPP, Université de Liège, 2-8 sept. 2001 BAR International Series, 1240* (ed Section Secrétariat général du Congrès) 225-241. (Archaeopress, 2004).
- 7 Derevianko, A. P., Markin, S. V., Gladyshev, S. A. & Olsen, J. W. The Early Upper Paleolithic of the Gobi Altai Region in Mongolia Based on Materials from the Chikhen-2 Site. *Archaeology, Ethnology and Anthropology of Eurasia* **43**, 17-41, doi:<https://doi.org/10.1016/j.aeae.2015.11.004> (2015).
- 8 Yi, S. Rashaan Khad - An Early Blade Industry in Eastern Mongolia. *Journal of the Korean Palaeolithic Society* **28**, 105-129 (2013).
- 9 Ermini, L. *et al.* Complete Mitochondrial Genome Sequence of the Tyrolean Iceman. *Current Biology* **18**, 1687-1693, doi:<https://doi.org/10.1016/j.cub.2008.09.028> (2008).
- 10 Fu, Q. *et al.* Genome sequence of a 45,000-year-old modern human from western Siberia. *Nature* **514**, 445, doi:10.1038/nature13810 (2014).
- 11 Sikora, M. *et al.* Ancient genomes show social and reproductive behavior of early Upper Paleolithic foragers. *Science* **358**, 659-662, doi:10.1126/science.aao1807 (2017).
- 12 Fu, Q. *et al.* An early modern human from Romania with a recent Neanderthal ancestor. *Nature* **524**, 216-219, doi:10.1038/nature14558 (2015).
- 13 Reimer, P. J. *et al.* IntCal13 and Marine13 Radiocarbon Age Calibration Curves 0–50,000 Years cal BP. *Radiocarbon* **55**, 1869-1887, doi:[https://doi.org/10.2458/azu\\_js\\_rc.55.16947](https://doi.org/10.2458/azu_js_rc.55.16947) (2013).
